# Supplementary material for: An integrated view of the role of miR-130b/301b miRNA cluster in prostate cancer
Source: Springer Nature journal article supplement (doi:10.1186/s40164-018-0102-0), 2018-05-02

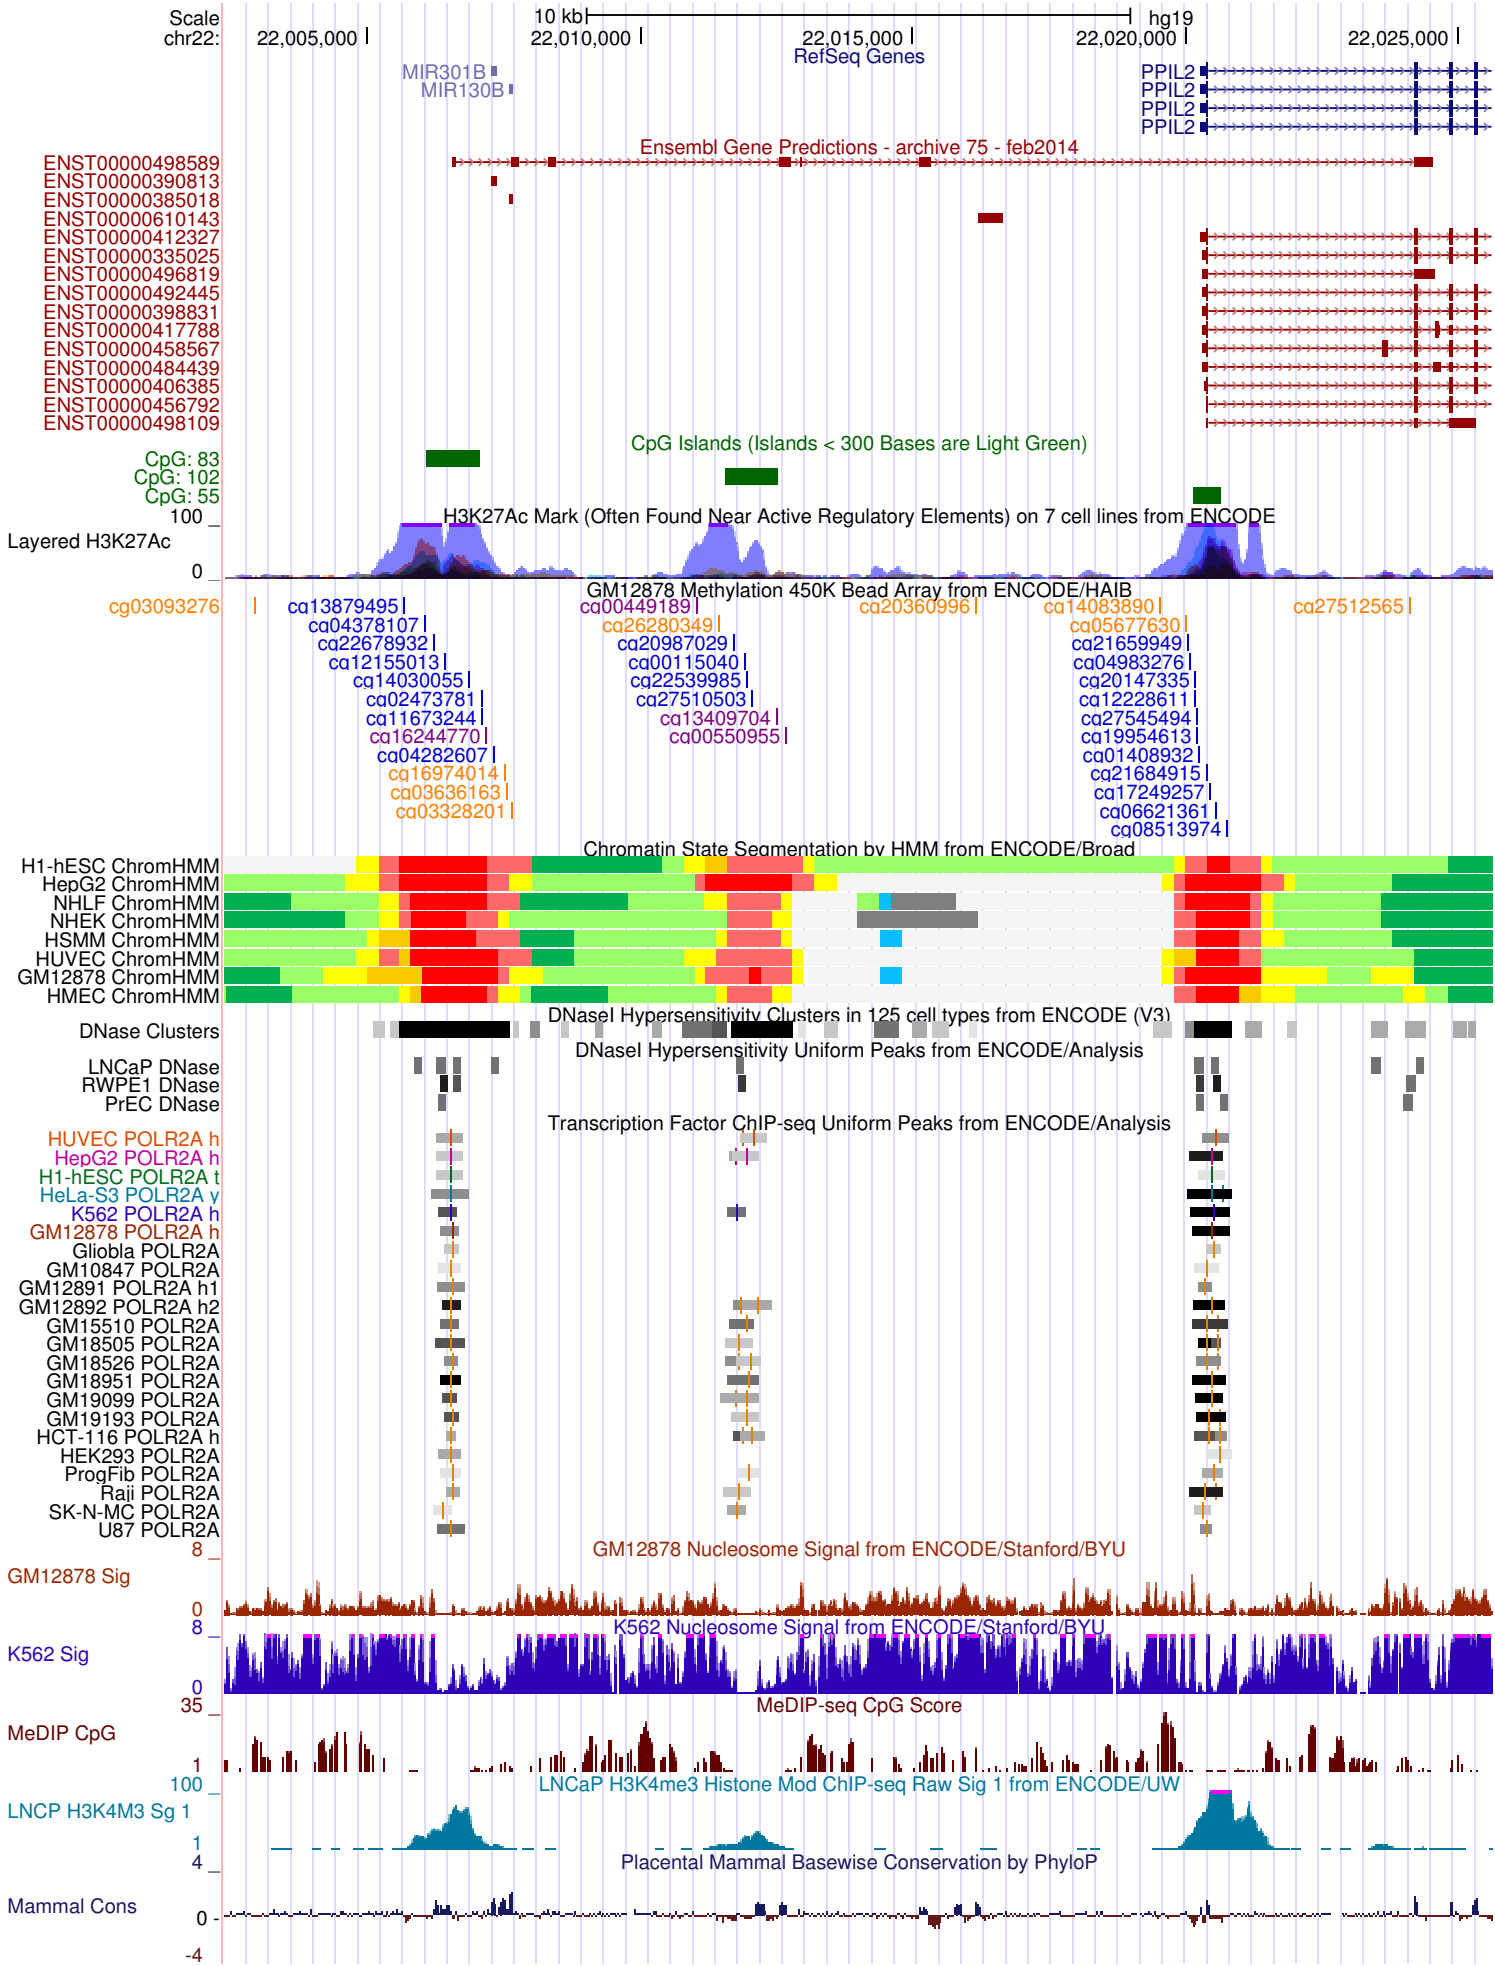

Supplement: MOESM1 [file 15733528]
